1 **Particle-associated and free-living bacterial communities in an oligotrophic sea**  
2 **are affected by different environmental and anthropogenic factors**

3

4 Dalit Roth Rosenberg<sup>1</sup>, Markus Haber<sup>1</sup>, Joshua Goldford<sup>2</sup>, Maya Lalar<sup>3</sup>, Dikla Aharonovich<sup>1</sup>, Ashraf Al-  
5 Ashhab<sup>1,4</sup>, Yoav Lehahn<sup>5</sup>, Michael D. Krom<sup>1,6</sup>, Daniel Segrè<sup>2</sup>, Laura Steindler<sup>1</sup> and Daniel Sher<sup>1</sup>

6 <sup>1</sup>Department of Marine Biology, Leon H. Charney School of Marine Sciences, University of Haifa, Israel; <sup>2</sup>

7 Bioinformatics Program, Boston University, USA; <sup>3</sup> Bioinformatics Support Unit, University of Haifa,

8 Israel; <sup>4</sup>Microbial Metagenomics Division, Dead Sea and Arava Science Center, Masada, Israel;

9 <sup>5</sup>Department of Maritime Geosciences, Leon H. Charney School of Marine Sciences, University of Haifa,

10 Israel. <sup>6</sup>Morris Kahn Marine Research Station, Department of Marine Biology, Leon H. Charney School of

11 Marine Science, University of Haifa, Haifa, 3498838, Israel.

12

13 Corresponding author: Daniel Sher, [dsher@univ.haifa.ac.il](mailto:dsher@univ.haifa.ac.il)

14

15 **Originality – Significance Statement (need to take from summary)**

16

17 **Summary**

18 In the oceans and seas, environmental conditions change over multiple temporal and spatial scales.

19 Here, we ask what factors affect the bacterial community structure across time, depth and size fraction

20 during six seasonal cruises (two years) in the ultra-oligotrophic Eastern Mediterranean Sea. The bacterial  
21 community varied most between size fractions (free-living vs particle-associated), followed by depth and  
22 finally season. The free-living (FL) community was taxonomically richer and more stable than the  
23 particle-associated (PA) one, which was characterized by recurrent “blooms” of heterotrophic bacteria  
24 such as *Alteromonas* and *Ralstonia*. The heterotrophic FL and PA communities were also correlated with  
25 different environmental parameters: depth and phytoplankton correlated with the FL population,  
26 whereas PA bacteria were correlated primarily with season. A significant part of the variability in  
27 community structure could not, however, be explained by the measured environmental parameters. The  
28 metabolic potential of the PA community, predicted from 16S amplicon data, was enriched in pathways  
29 associated with the degradation and utilization of biological macromolecules, as well as plastics, other  
30 petroleum products and herbicides. The FL community was enriched in pathways for the metabolism of  
31 inositol phosphate, a potential phosphorus source, and of polycyclic aromatic hydrocarbons.

## 32 **Originality – Significance Statement**

33 Marine microbial populations are complex and dynamic, and the environmental drivers of the structure  
34 and function of these communities are mostly unclear. Specifically, marine microbial communities  
35 change over time, over depth and between particle-associated and free-living size fractions, yet the  
36 relative importance of each of these axes of variability is unclear. Our results highlight fundamentally  
37 different population dynamics between free-living and particle-associated marine bacteria: free living  
38 populations were more similar between seasons, whereas particle-associated populations were highly  
39 variable and exhibited “blooms” of specific clades of heterotrophic bacteria. We also suggest that the  
40 environmental conditions often measured as part of oceanographic cruises are not enough to explain  
41 most of the variability in microbial population structure. We speculate that organismal interactions and

42 the presence of anthropogenic pollution may be also be important yet under-sampled drivers of  
43 oligotrophic marine microbial communities.

44

45 **Keywords:** Eastern Mediterranean, 16S amplicon sequencing, Particle-associated, Free-living,  
46 Seasonality, anthropogenic pollution, phytoplankton

47

48 **Running title:** Drivers of bacterial populations across scales

49

## 50 **Introduction**

51 To a microorganism, the marine environment presents a rich and ever-changing tapestry of conditions  
52 and potential niches. On scales of microns to millimeters, which can be traversed by motile bacteria  
53 within minutes, various types of particles and gels provide carbon- and nutrient-rich hotspots which  
54 differ from the bulk surrounding seawater in their chemistry and physics (Azam and Malfatti 2007).  
55 Other environmental parameters such as light intensity, temperature and the concentrations of  
56 dissolved inorganic and organic nutrients change markedly with depth over scales of tens to hundreds of  
57 meters, particularly when the water column is stratified (Karl 2007). Depending on the structure of the  
58 water column and the vertical movement of macro-organisms and sinking particles, bacteria can  
59 traverse such distances (both up and down) on scales of hours to days (e.g. (Grossart et al. 2010, Mestre  
60 et al. 2018)). Finally, changes in environmental conditions can occur over spatial scales of hundreds of  
61 kilometers or temporal scales of weeks to months. For example, seasonal changes in weather or  
62 geographic changes in environmental conditions are driven by global climate patterns (Giovannoni and

63 Vergin 2012). Seasons affect the physical structure of the water column and, through mixing of water  
64 masses, control the injection of inorganic nutrients into the photic zone. Indeed, microbial populations  
65 in the oceans differ over multiple spatial and temporal scales (Fuhrman 2009, Martin-Platero et al. 2018,  
66 Salazar et al. 2019). While our understanding of the processes that shape marine microbial communities  
67 over these scales has been steadily increasing (Karl et al. 2002), many questions remain unanswered. For  
68 example, changes in microbial population structure have been documented between different size  
69 fractions (e.g. (Mestre et al. 2017)), along a depth gradient (DeLong et al. 2006) and over seasonal cycles  
70 (Ward et al. 2017), yet few studies have addressed these spatio-temporal axes of variability together.  
71 Which of these environmental factors has a more pronounced effect on microbial populations? Are  
72 changes in heterotrophic microbial populations driven primarily by variation in “a-biotic” conditions, or  
73 do other factors affect population structure, for example biotic interactions with co-occurring  
74 phytoplankton? Can we predict which genetic traits or metabolic functions underlie changes in  
75 community structure along these gradients of variability?

76 To begin addressing some of these questions, we characterized the environmental conditions, the  
77 phytoplankton community, and the bacterial community structure across multiple spatio-temporal  
78 scales in the Levantine Basin of the Eastern Mediterranean Sea (EMS). Despite being an inland sea,  
79 surrounded by ~480 million people (Bleu 2009), the open waters of the Mediterranean, and particularly  
80 the EMS, are oligotrophic to ultra-oligotrophic (Fig. 1A, (Berman et al. 1985)). Nutrient concentrations in  
81 the photic zone are typically very low (close to the level of detection), as are chlorophyll and particulate  
82 carbon, and the photic zone may extend quite deep, with a dominant Deep Chlorophyll Maximum  
83 (DCM) often observed as deep as ~140m (Berman et al. 1985, Krom et al. 2005). Phytoplankton in the  
84 EMS are often phosphorus-limited or nitrogen and phosphorus co-limited (Krom et al. 2005, Thingstad  
85 et al. 2005). Pico-cyanobacteria such as *Prochlorococcus* and *Synechococcus* are the numerically  
86 dominant phytoplankton, although photosynthetic pico-eukaryotes are also common and potentially

87 dominant in terms of production or biomass (Man-Aharonovich et al. 2010). The deep waters of the EMS  
88 are much warmer than those of many oceanic regions, with the temperature never dropping below  
89  $\sim 12^{\circ}\text{C}$ . The deep waters are mixed into Levantine Intermediate waters and these combined waters exit  
90 the Eastern Mediterranean (EMS) at the Straits of Sicily, eventually exiting the Mediterranean through  
91 the straits of Gibraltar and affecting large parts of the Atlantic Ocean. Recent studies have shown that  
92 several water masses of the EMS are warming and becoming more saline at a rate significantly higher  
93 than the average global trend predicted by the IPCC (Ozer et al. 2017). Thus, while the EMS exhibits  
94 conditions reminiscent of those in the major oceanic gyres (Powley et al. 2017), it is a potentially useful  
95 “natural laboratory” to understand the effect of environmental conditions, including climate change, on  
96 microbial processes.

97 To obtain a dynamic view of how environmental parameters at multiple scales affect the microbial  
98 population structure, we present and interpret physical, chemical and biological information from six  
99 cruises to a pelagic station in the EMS. Station n-1200 is  $\sim 25$  nautical miles from shore, where the water  
100 column depth is 1200m. The cruises were performed during three seasons (fall, spring and summer) of  
101 two consecutive years. Samples were collected from five discrete depths (surface,  $\frac{1}{2}$  DCM, DCM, 200m  
102 and 500m) and separated into different size fractions,  $>11\mu\text{m}$  and  $5-0.22\mu\text{m}$ , representing particle-  
103 associated and free-living microbes, respectively. These data allow us to describe and interpret the  
104 natural changes in microbial populations in the EMS over different scales: (i) particle associated vs. free-  
105 living, (ii) over depth, and (iii) over seasons.

106

## 107 **Results and discussion**

### 108 **Physical, chemical and biological properties of the EMS during the cruises**

109 During 2014-2016, a clear seasonal cycle in sea surface Chlorophyll was observed in the EMS, with  
110 maxima in winter and early spring and minima in summer, consistent with previous *in-situ*  
111 measurements (Fig. 1B, (Azov 1986, Raveh et al. 2015)). Our sampling cruises were timed to coincide  
112 with the increase in surface chlorophyll during fall, the subsequent decrease phase during spring, and  
113 the stable, ultra-oligotrophic summer conditions. The changes in surface chlorophyll were associated  
114 with changes in the structure of the water column, which was highly stratified during summer, with the  
115 depth of mixing increasing during fall and peaking during early spring (Supporting Information Fig. S1).  
116 Macronutrient profiles show that the surface waters, down to ~200m, were poor in nitrate+nitrite and  
117 phosphorus with the lowest values in July compared to fall and spring (Supporting Information Fig. S2). A  
118 deep chlorophyll maximum (DCM) was observed in all cruises apart from the November 2015 one, and  
119 was generally shallower during fall and spring (70-90m) and deeper during the summer (90-140m,  
120 Supporting Information Fig. S1).

121 While clear seasonal patterns were observed in the surface chlorophyll, more complicated patterns  
122 were observed in the composition and relative abundance of different phytoplankton groups within the  
123 photic zone. Based on flow cytometry counts, during most of the year, *Prochlorococcus* were the  
124 numerically most abundant phytoplankton, particularly deeper in the water column ( $\frac{1}{2}$  DCM and DCM,  
125 Supporting Information Fig. S3). *Synechococcus* were usually more abundant at the surface (10m and  
126 occasionally  $\frac{1}{2}$  DCM). Consistent with the flow cytometry counts, divinyl-chlorophyll *a* (a pigment which  
127 is unique to *Prochlorococcus*) peaked at the DCM, yet never comprised more than ~12.5% of the total  
128 chlorophyll concentration, suggesting that other phytoplankton may be more dominant in terms of  
129 biomass (Supporting Information Fig. S4). Indeed, 19'-hex-fucoxanthin ("19-hex"), a pigment  
130 characteristic of prymnesiophytes (Jeffrey et al. 2005), was relatively abundant at the DCM, particularly  
131 during the first year. While 19'- but – fucoxanthin ("but") and fucoxanthin ("fuco") were also observed,  
132 we cannot conclude that diatoms were present at high abundances, as these pigments are also found in

133 prymnesiophytes. Peridinin, which is characteristic of dinoflagellates, was observed mainly in the fall of  
134 both years and the spring of the second year, at the  $\frac{1}{2}$  DCM and DCM depths. These results are  
135 consistent with previous studies suggesting that pico-eukaryotes, and particularly coccolithophores  
136 (which are prymnesiophytes), are an important part of the phytoplankton community, which is dynamic  
137 across time and depth (Man-Aharonovich et al. 2010). These results also suggest that non-seasonal  
138 (potentially aperiodic) dynamics may influence phytoplankton dynamics (Karl et al. 2002).

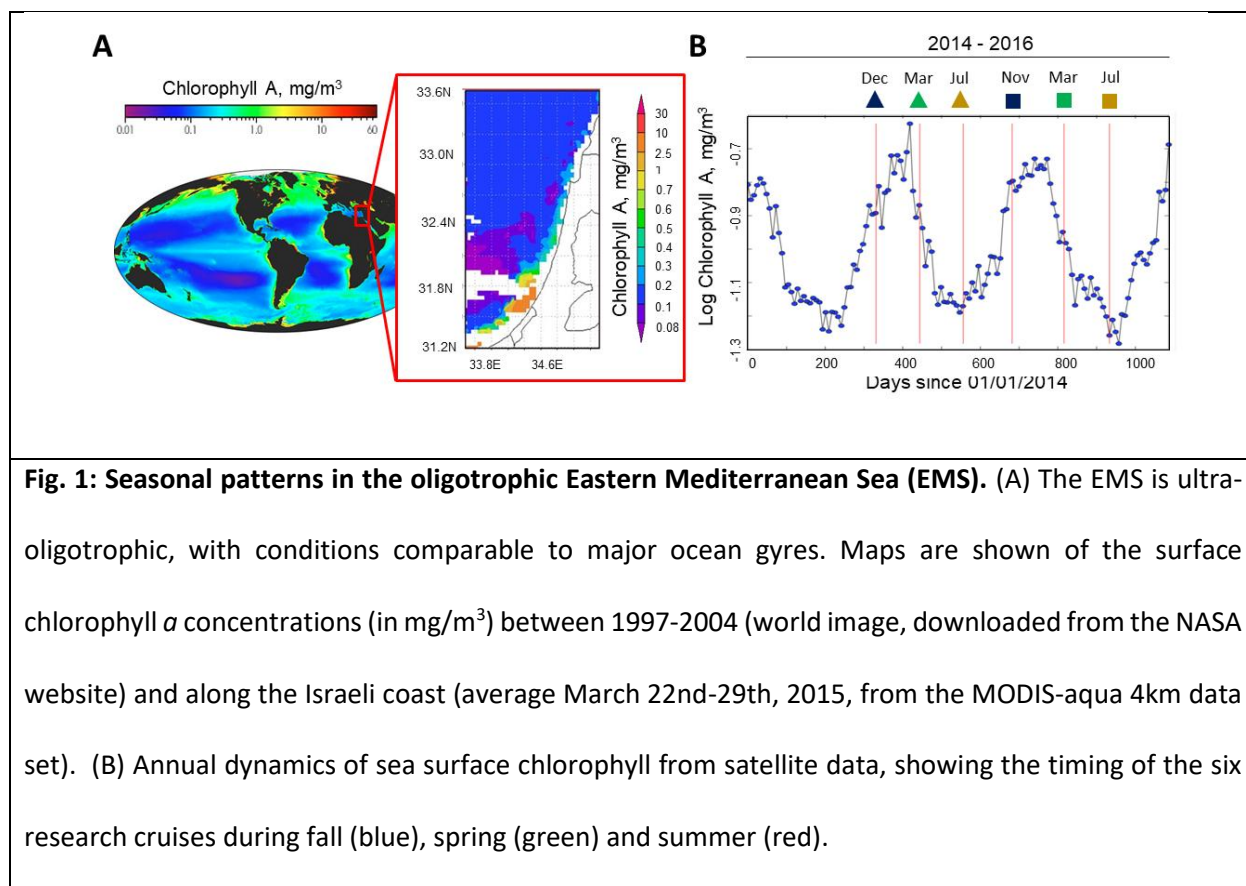

139

## 140 **Overview of the changes in bacterial population structure across size fraction, depth and** 141 **season**

142 As shown in Figure 2 and Supporting Information Fig. S5, clear differences were observed between the  
143 particle-associated bacterial communities (PA,  $>11\mu\text{m}$ ) and the free-living ones (FL,  $5\text{-}0.22\mu\text{m}$ ). Several

144 samples representing the intermediate size fraction (11-5 $\mu$ m) were also analyzed, and these revealed a  
145 population structure somewhat similar to both PA and FL fractions, in agreement with previous studies  
146 suggesting a continuous shift in population structure across different size fractions ((Mestre et al. 2017,  
147 Mestre et al. 2017), Figure 2A, B). The FL and PA populations both varied with depth, although the  
148 changes with depth in the PA community were less pronounced (see details below). No clear clustering  
149 of the populations by season was observed in the NMDS ordination (Figure 2B). Indeed, the Bray Curtis  
150 dissimilarity was highest between FL and PA communities, followed by the difference with depth, with  
151 the lowest variability observed between seasons (Figure 2C). Thus, in the open EMS, size fraction and  
152 depth are likely the most important drivers of microbial community composition.

153 The differences between FL and PA communities were lower at the surface, increasing with depth (Fig.  
154 2, Supporting Information Fig. S6A). This is consistent with a mechanism whereby many particles  
155 originate in the surface layer, either formed autochthonously or added as atmospherically derived  
156 particles (e.g. dust (Herut et al. 2002)). The particles are colonized primarily by surface layer bacteria,  
157 with the exchange between FL and PA populations becoming less common with depth (Mestre et al.  
158 2018). At a coarse grained phylogenetic resolution, the FL population was dominated primarily by 16S  
159 sequences belonging to  $\alpha$ -proteobacteria from the SAR11 clade (*Pelagibacter*), which comprised up to  
160 ~40% of the sequences in the FL fractions, mostly in the surface waters, (Supporting Information Fig. S5).  
161 Other abundant heterotrophic lineages were SAR86 ( $\gamma$ -proteobacteria, up to 15% in surface waters  
162 during summer and spring), SAR 406 (Marinimicrobia, up to 8% in deeper waters) and SAR 202  
163 (Chloroflexi, primarily intermediate depths, up to 12%). Conversely, the PA communities were rich in  $\gamma$ -  
164 proteobacteria and Planctomycetes, as well as occasionally  $\beta$ -proteobacteria,  $\delta$ -proteobacteria or  
165 Verrucomicrobia, phyla previously described as associated with marine particles from the Atlantic  
166 (Milici et al. 2016), Baltic (Rieck et al. 2015) and Mediterranean Seas (Mestre et al. 2017, Mestre et al.  
167 2017). Notably, while pico-cyanobacteria such as *Prochlorococcus* and *Synechococcus* were primarily



168 observed in the FL fraction, they also comprised as much as ~6% of the 16S reads from the PA  
169 communities, and up to ~21% of the communities in the size range of 11-5 $\mu$ m (Supporting Information  
170 Fig. S5, Supplementary excel file). *Prochlorococcus* and *Synechococcus* are primarily free-living cells,  
171 however, previous studies have suggested that pico-cyanobacteria do contribute to particulate sinking  
172 fluxes, although the magnitude of this process is unclear, and may depend on the specific oceanographic  
173 conditions (Richardson and Jackson 2007, Lomas and Moran 2012, De Martini et al. 2018). The presence  
174 of *Prochlorococcus* and *Synechococcus* cells in the PA fractions suggests a potential involvement of these  
175 clades in sinking fluxes in the EMS.

176 Within the FL fraction, the population structure clearly changed with depth, with the main differences  
177 seen between the communities from the photic zone (here defined as down to 200m) and the  
178 mesopelagic (200m and 500m, Fig. 2A, Supporting Information Fig. S5, S6B). The dissimilarity among  
179 sampling depths was higher during stratified seasons than during spring, consistent with a partial  
180 homogenization of the water column by winter/spring mixing (t-test,  $p < 0.001$ , Supporting Information  
181 Fig. S6B). As expected from other studies, cyanobacteria and Bacetroidetes were relatively more  
182 abundant in the photic zone, whereas  $\delta$ -proteobacteria, Marinimicrobia and Chloroflexi were more  
183 associated with deeper samples (Haro-Moreno et al. 2018, Mende et al. 2019). The change of the PA  
184 community with sampling depth was weaker, observed in the NMDS analysis (Figure 2) but not in the  
185 one-dimensional clustering (Supporting Information Fig. S5), and no clear differences with sampling  
186 depth were observed (Supporting Information Fig. S6C). Instead, the PA community seemed to partition  
187 into samples dominated by  $\gamma$ -proteobacteria (primarily *Alteromonas*), and those where  
188 Planktomycetota, Bacteroidetes or  $\beta$ -Proteobacteria were more dominant (Supplementary Figure 5 and  
189 see below).

190 In contrast to the clear effects of particle association and depth on microbial community structure, no  
191 obvious partitioning by season could be observed in the NMDS or clustering (Figure 2B, Supporting  
192 Information Fig. S5). Nevertheless, seasonal differences were observed when the same size fraction and  
193 depth were compared (Supporting Information Fig. S6B, C, D). The seasonal differences were  
194 significantly larger in the PA compared to the FL populations, suggesting that qualitatively different  
195 particles may be found at different seasons. Surprisingly, within the FL population, seasonal variability  
196 was lower at the surface and  $\frac{1}{2}$  DCM compared with the deeper samples. We initially expected seasonal  
197 differences to be highest at the surface, reflecting major changes in sea surface temperature, which has  
198 been suggested to be major driver of microbial community structure and function (Sunagawa et al.  
199 2015). The higher inter-seasonal differences detected at intermediate depths (100-200m) suggest that  
200 factors other than temperature are causing seasonal changes in the populations at these depths. These  
201 may include the quality and intensity of light supporting variable deep phytoplankton populations, or  
202 the availability of nutrients mixed up from the nutricline (Karl et al. 2002).

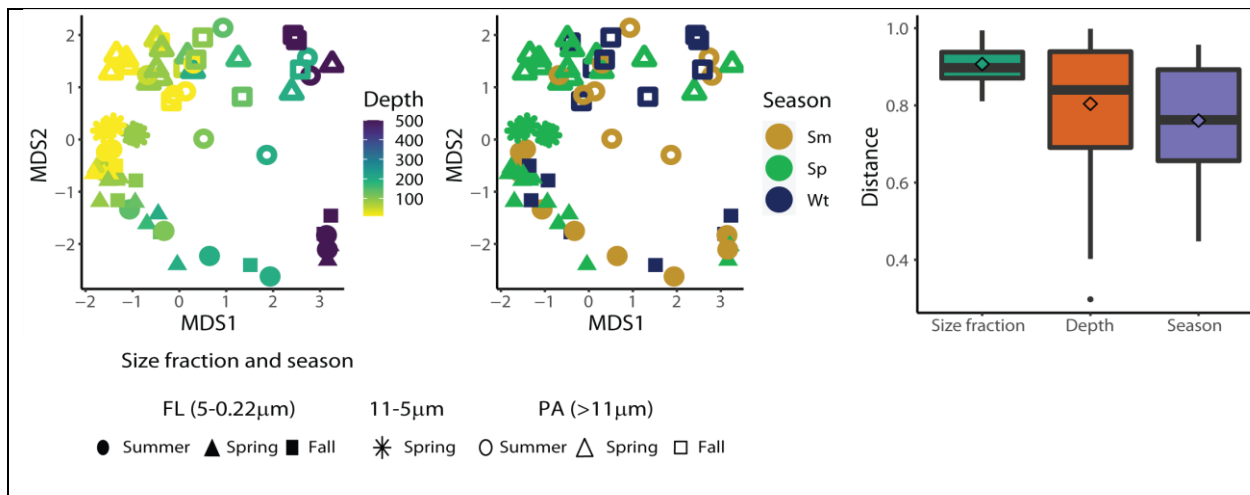

**Figure 2:** Effects of size fraction, depth and season on bacterial population structure. (A, B)

Nonparametric Multi-Dimensional Scaling (NMDS) plot of the bacterial populations, colored by depth (A) and by season (B). Full shapes are FL, open shapes are PA, with the two groups clearly separated

along NMDS axis 2. Both FL and PA communities change over depth along NMDS axis 2, but do not cluster by season. NMDS stress = 0.11. (C) Bray-Curtis dissimilarity is highest with size fraction, followed by depth and season. The dissimilarity was calculated within groups, e.g. comparisons of depth were performed within the same cruise and size fraction. The means of the size fractions are all statistically different (t-test,  $p < 0.001$ , (Fagerland 2012)).

203

## 204 **Particle-associated and free-living communities have different strain-level (ESV) dynamics**

205 A detailed inspection of the community structure (Supporting Information Fig. S5, Supporting excel file)  
206 suggests that some PA communities are dominated by a limited number of ESVs (exact sequence  
207 variants, which represent distinct 16S phylotypes). Indeed, the FL population was more diverse  
208 (Shannon and inverse Simpson indices) and more even than the PA ones (Figure 3A). These results are  
209 consistent with studies from major ocean gyres and the offshore western Mediterranean (Ghiglione et  
210 al. 2007, Mestre et al. 2018), whereas studies from the North Sea, the Baltic Sea and coastal locations in  
211 the western Mediterranean suggest that PA communities are more diverse than FL ones (Bižić-Ionescu  
212 et al. 2015, Rieck et al. 2015, Mestre et al. 2017). It is possible that the productivity (trophic status) of  
213 the community determines whether FL or PA communities are more diverse, perhaps because more  
214 productive regions tend to produce larger particles or larger phytoplankton with potentially more micro-  
215 niches. The alpha diversity indices of the FL populations, but not the PA ones, increased with depth  
216 throughout the photic zone (Supporting Information Fig. S7). This again suggests that, despite the  
217 variability in surface temperature, intermediate depths may provide more niches for FL bacteria than  
218 the surface waters.

219 Consistent with the higher  $\alpha$ -diversity of the FL populations, the most abundant ESVs comprised at most  
220 ~8% of the 16S reads of the FL population, compared with up to 21% of the reads for in the PA

221 community (Fig. 3B). While these differences could, in principle, be due to more 16S genes per genome  
222 in the PA bacteria compared with the FL ones, we also observed many more ESVs (each with at least 100  
223 reads across our dataset) corresponding to the abundant FL clades compared with the PA ones. For  
224 example, there were 192, 71 and 60 different ESVs belonging to the abundant FL clades SAR11, SAR86  
225 and SAR406, respectively, compared to 9, 3 and 2 ESVs belonging to the *Alteromonas*, *Oleibacter* and  
226 *Ralstonia* clades that dominated specific PA samples.

227 The FL and PA communities also differed qualitatively in the temporal dynamics of the most abundant  
228 ESVs. The FL communities were relatively similar across cruises, changing primarily with depth. For  
229 example, the ten most relatively abundant SAR11 ESVs were all observed in at least one depth from  
230 each cruise, albeit with differing temporal and depth patterns (Fig. 3C). Similarly, the five most  
231 fractionally abundant cyanobacterial ESVs were also observed in all of the cruises, and their dynamics  
232 over time and depth were consistent with the flow-cytometry counts (Supporting Information Fig. S3)  
233 and with ecotype-level dynamics observed in other oligotrophic oceans (e.g. (Malmstrom et al. 2010)).  
234 In contrast, many of the most fractionally abundant ESVs in the PA populations were highly dominant in  
235 samples from one or two cruises, and rare or almost absent in others. For example, four ESVs, all closely  
236 related to *Alteromonas macleodii* (a  $\gamma$ -proteobacterium), were very common in the spring and summer  
237 of 2015, together comprising up to 65% of the sequencing reads. These same ESVs were found at much  
238 lower relative abundances at other sampling times. Similarly, *Ralstonia* (a  $\beta$ -proteobacterium)  
239 dominated intermediate depths in summer and fall of 2015, and *Oleibacter* (also a  $\gamma$ -proteobacterium)  
240 dominated during the spring and summer of 2016. In many cases, the same ESVs dominated replicate  
241 samples from the same time or samples from different depths of the same cruise (Supporting Excel file),  
242 suggesting that these “heterotroph blooms” are not limited to individual particles but rather represent a  
243 general feature of the PA community at a specific time and depth. A more detailed description of the

244 dynamics of SAR11, *Prochlorococcus*, *Alteromonas* and *Ralstonia* is presented in the supplementary

245 information.

246

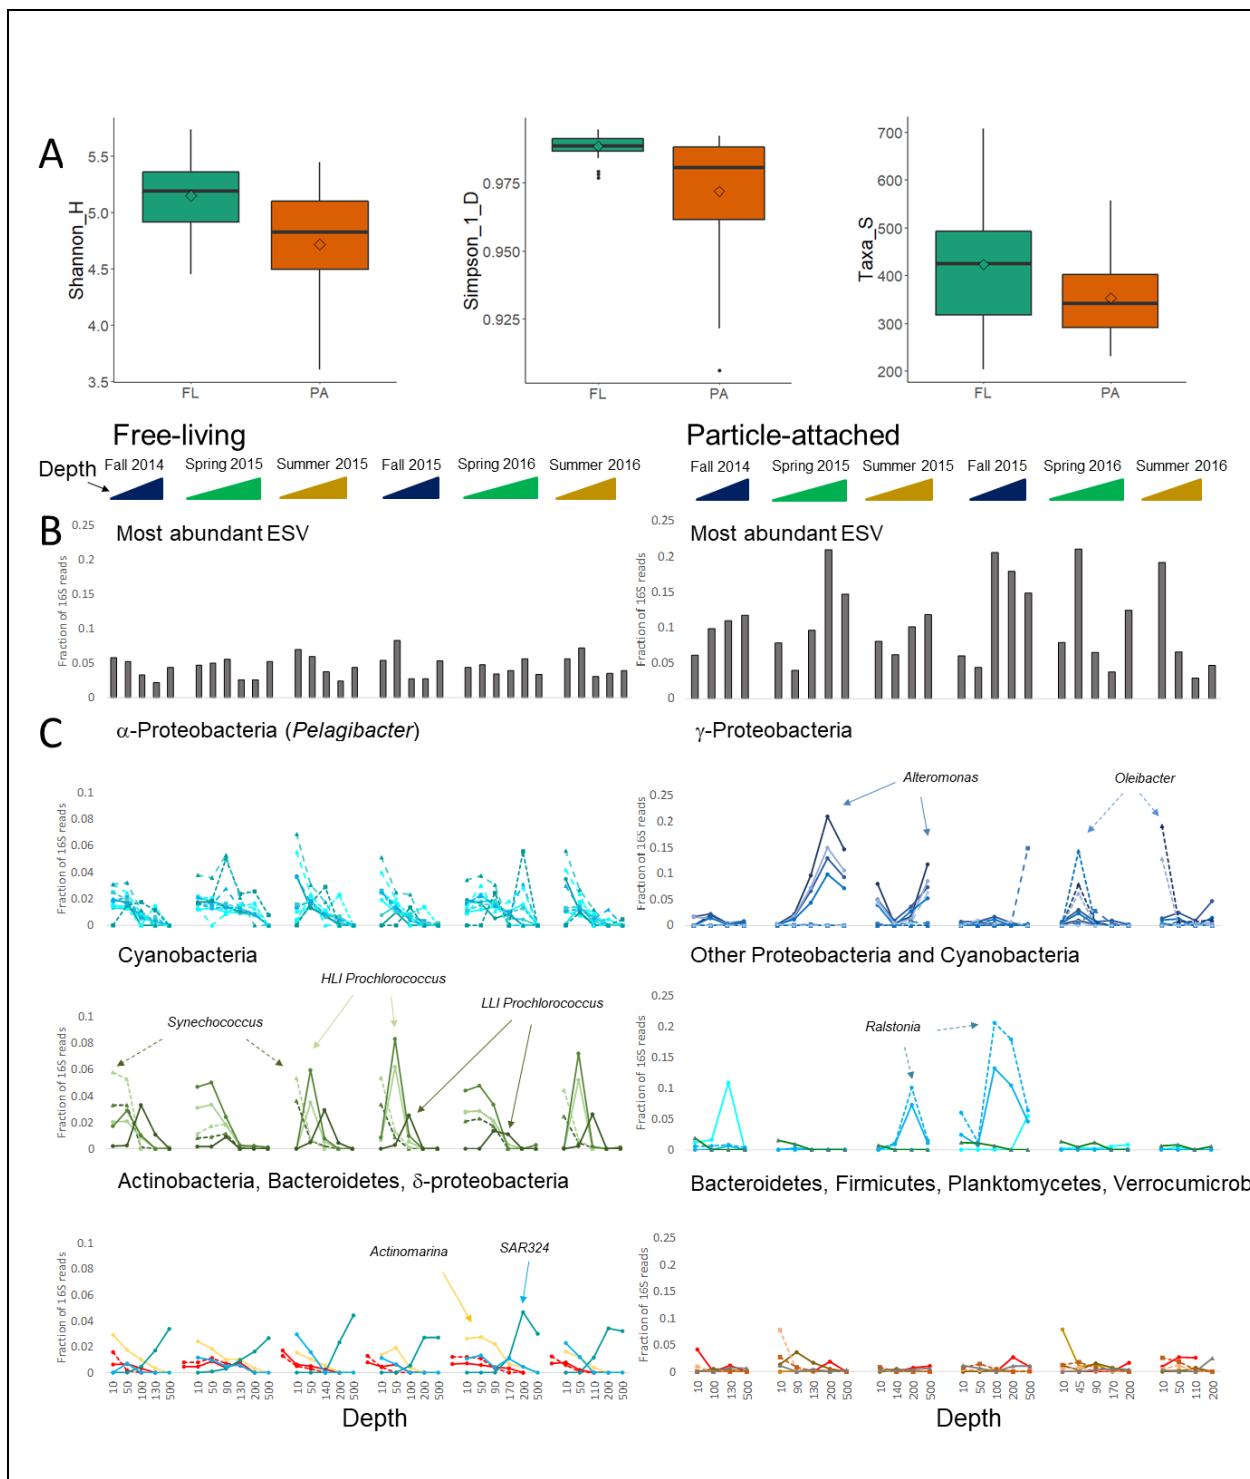

**Figure 3:** Diversity and ESV dynamics differ between FL and PA communities. In panels B and C, each individual graph shows a depth profile of a separate cruise. (A) FL populations are more diverse than PA ones. Boxes show medians, 25<sup>th</sup> and 75<sup>th</sup> quartiles; whiskers show 1.5 times the interquartile range,

and outliers are plotted individually. Diamonds show means. All differences are statistically significant (t-test,  $p < 0.001$  for comparisons of Inverse Simpson and Shannon indices and  $p = 0.002$  for comparison of the number of taxa). (B) Relative abundance of the most common ESV in each sample (cruise, depth and size-fraction). (C) Relative abundance of the 20 most common ESVs across each of the FL and PA populations. For depths with duplicate samples, the mean of the duplicates is shown. ESVs are colored based on their phylogeny using the same color code as in Supporting Information Fig. 5, and specific ESVs mentioned in the text are highlighted by arrows. For detailed information please see Supporting Information Excel file.

247

248 **Different environmental factors affect the free-living and particle-associated heterotrophic**

249 **populations**

250 The increase in FL bacterial diversity at intermediate depths, and the “heterotroph blooms” observed in  
251 the PA community, prompted us to ask whether the heterotrophic bacterial community structure might  
252 be determined, at least in part, by interactions with specific phytoplankton groups. Phytoplankton can  
253 affect heterotrophic bacteria by providing particulate niches and sources of organic material, as well as  
254 through direct signaling (reviewed by (Amin et al. 2012, Buchan et al. 2014, Cirri and Pohnert 2019,  
255 Durham et al. 2019)). To answer this question, we sought for statistical correlations between the  
256 heterotrophic bacterial community structure and three matrices of conditions corresponding to those  
257 associated with seasonality, depth and phytoplankton community structure, with the latter defined by  
258 the ratios of the concentrations of photosynthetic pigments (Supporting Information Figure S4,  
259 Supporting excel file). As shown in Fig. 4, the matrix of depth-related parameters explained the largest  
260 amount of variability in the FL populations (16%), with water depth and the concentration of  $\text{NO}_3 + \text{NO}_2$   
261 being significant explanatory variables. The matrices related to season and pigments alone explained

262 little variation, however, the combination of the matrices of pigments and depth had significant  
263 explanatory power. Of the four photosynthetic pigments significantly correlating with the FL  
264 heterotrophic population structure, two are associated with cyanobacteria, and specifically  
265 *Prochlorococcus* (DVChl-a, Chl-b), and one with prymnesiophytes (19'-hex). In contrast to the FL  
266 heterotrophic community, season-related factors, and specifically the depth of the mixed layer (MLD),  
267 were the only statistically significant determinants of PA heterotrophic communities, with a small but  
268 significant interaction with phytoplankton community. Thus, the main factors driving the heterotrophic  
269 FL and PA community structures were fundamentally different. In total, only 30-43% of the variation in  
270 heterotrophic population structure could be explained by correlations with seasonality, depth and/or  
271 phytoplankton community structure, suggesting that other environmental factors, which were not  
272 measured in this study, are important drivers of heterotrophic bacterial communities.

273

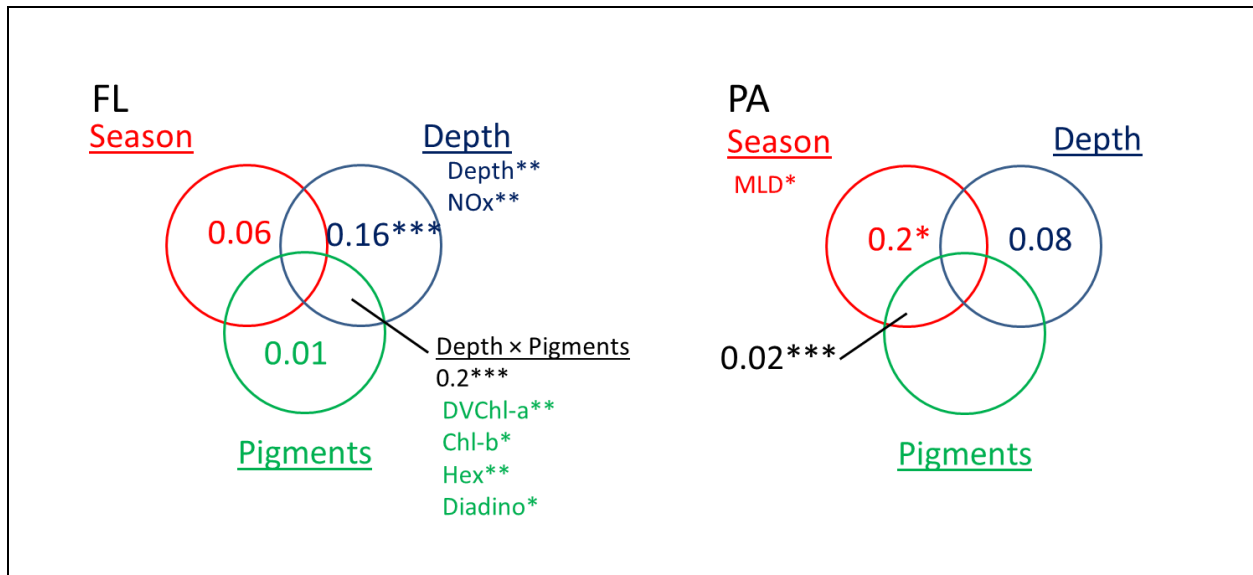

**Figure 4:** Different environmental factors are correlated with the structure of the PA and FL heterotrophic populations. The results of variation partitioning analysis are shown, with the numbers representing the fraction of the variation explained by each group of environmental parameters. When



no numbers are shown, this matrix had no explanatory power (zero or negative). Stars represent statistical significance: \* - <0.05, \*\* - <0.01, \*\*\* - <0.001, as estimated using canonical correspondence analysis. When pigments are shown, it is their ratio to chlorophyll a that is significantly correlated with heterotrophic population structure.

274

275

276 **Predicting metabolic functions that might underlie changes between the FL and PA heterotrophic**

277 **community structure**

278 In this study, we measured multiple environmental parameters known to affect bacterial physiology in  
279 the lab, and which could be expected to drive bacterial community structure in the oceans (Supporting  
280 Information Figs S1-4). Given that >55% of the variability could not be explained by these factors (Fig. 4),  
281 we used the 16S amplicon data itself to raise testable hypotheses as to additional environmental  
282 conditions that might drive heterotrophic population structure. We inferred the metagenome of the  
283 heterotrophic populations using PICRUSt (Langille et al. 2013), and searched for specific metabolic  
284 pathways predicted to be differentially abundant between the heterotrophic PA and FL populations, as  
285 the differences between these microbial populations were most clear (Fig. 2, 3). As shown in Fig. 5,  
286 many pathways were enriched in the PA compared with the FL heterotrophic populations, consistent  
287 with the generally larger genomes and richer metabolic capacities of particle-associated bacteria (Lauro  
288 et al. 2009). As expected, many of the pathways enriched in the heterotrophic PA bacteria were related  
289 to the degradation of macromolecules that comprise part of phytoplankton cells or zooplankton  
290 carapaces (e.g. glycoaminoglycans, starch, lipids, steroids and amino acids and precursors such as  
291 benzoate, Fig. 5). Many other enriched pathways, however, were for the degradation of anthropogenic  
292 pollutants. These included pathways for the degradation of organic compounds used extensively in the

293 petroleum or plastic industries, such as caprolactam, styrene, xylene, bisphenol A, ethylbenzene and  
294 toluene/nitrotoluene. Other pathways were related to the degradation of herbicides, pesticides or  
295 compounds involved in their biosynthesis (e.g. fluorobenzoate, atrazine). Plastics (including micro-plastic  
296 particles) are ubiquitous in many marine environments (e.g. (Kwon et al. 2015)). They may potentially be  
297 important in the dominantly down-welling EMS, in a similar way to their concentration in mid-oceanic  
298 gyres (Powley et al. 2017, Chen et al. 2018). Plastics provide surfaces which bacteria can colonize and  
299 potentially utilize (Oberbeckmann and Labrenz 2020). Plastics also leach dissolved organic carbon, which  
300 may stimulate bacterial growth (Romera-Castillo et al. 2018), but these leachates can also inhibit the  
301 growth of key organisms such as pico-phytoplankton (Echeveste et al. 2010, Tetu et al. 2019). Finally,  
302 plastics are also thought to adsorb many other contaminants such as pesticides, leading to a local  
303 increase in the latter molecule's concentration (e.g. (Rios et al. 2010, Chen et al. 2018)). We speculate  
304 that the presence of microplastics may select for PA bacteria able to colonize and utilize these carbon  
305 sources, while being resistant to toxic leachates and adsorbed contaminants, thus affecting  
306 heterotrophic PA population structure.

307 Only two pathways were enriched in the heterotrophic FL bacteria compared to the PA ones, consistent  
308 with their typically smaller genomes, one for the degradation of polycyclic aromatic hydrocarbons  
309 (PAHs) and the other for the degradation of inositol phosphates. PAHs may be produced naturally but  
310 the anthropogenic input of PAHs is far larger than that from natural sources, and thus we hypothesize  
311 that the predicted enrichment of pathways to degrade PAHs in heterotrophic FL bacteria is due to their  
312 presence as a result of anthropogenic pollution (Ghosal et al. 2016). It is known that PAH's are present in  
313 atmospheric aerosol particles deposited in the EMS particularly from air masses that have passed over  
314 polluted areas of southern Europe (Iakovides et al. 2019). Inositol phosphates are a group of ubiquitous  
315 signaling molecules in animals, a major form of P storage in plant seeds, and abundant forms of P in  
316 some freshwater phytoplankton (Turner et al. 2002). They are found widely in the environment, yet are

317 relatively under-studied and represent a major gap in our understanding of the global P cycle (Turner et  
318 al. 2002).

319

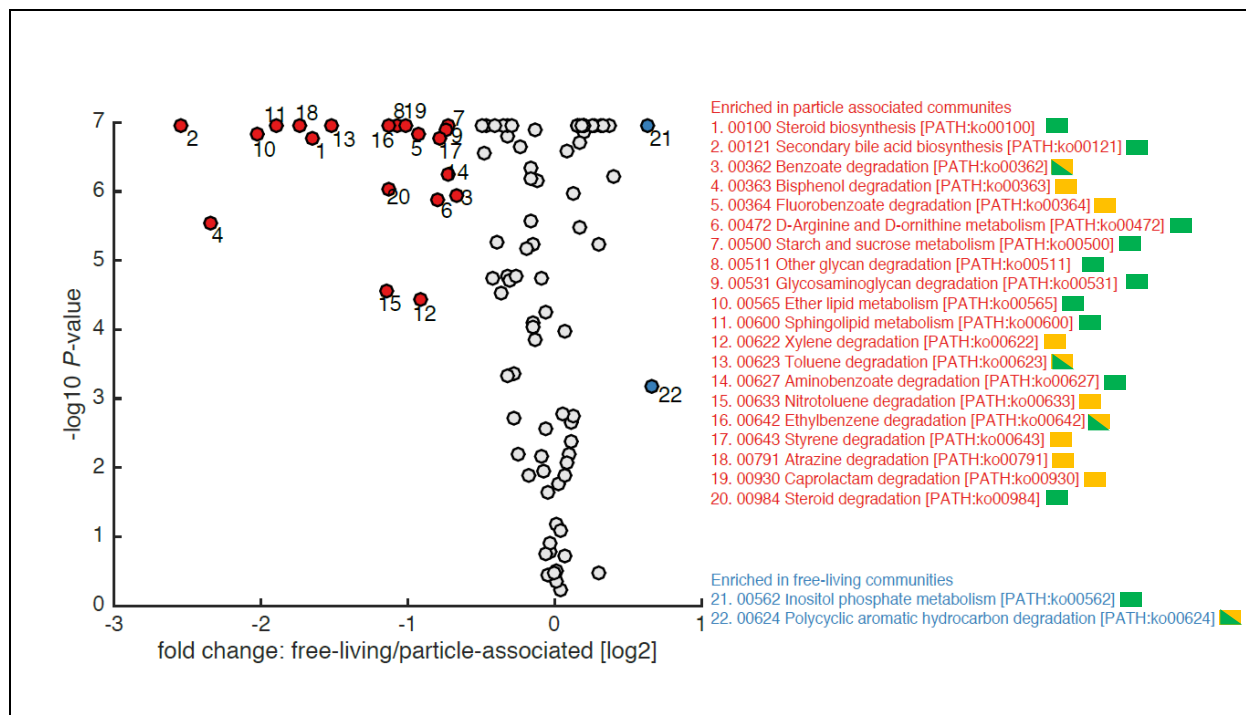

**Figure 5:** KEGG pathways predicted by PICRUSt to be enriched in the PA (red) and FL (blue) heterotrophic populations. Pathways are ordered by KEGG number and those related to the degradation of animal or plant-derived compounds and of anthropogenic pollutants are marked in green and orange, respectively. Benzoate and ethylbenzene are produced anthropogenically in large amounts but can also occur naturally (in natural petroleum or tar), and thus are marked in both green and orange. Similarly, toluene is used extensively as a thinner and in the petroleum industry, but can also be found in some resins, and is thus marked in both green and orange. The number of pathways enriched in the heterotrophic PA community related to the degradation of anthropogenic pollution, and the number of genes in these pathways, are both statistically higher than those in the full set of KEGG pathways analyzed (Fishers' Exact Test,  $p=0.0081$  for number of pathways,  $p<0.001$  for number

of genes in the KEGG pathways in PiCRUST). The enrichment for pathways involved in degrading anthropogenic pollutants is specific for the comparison of PA vs FL: Pathways co-varying with depth are not enriched in these functions (Fisher's Exact Test,  $p=0.702$ ), and while there may be some seasonal signal to the enrichment of these pathways, it is not significant (Fisher's Exact Test  $p=0.054$ ).

320

## 321 **Summary and outlook**

322 Understanding the myriad factors that determine the structure and function of marine microbial  
323 communities requires two distinct view points, operating at different scales. At the one end,  
324 oceanographic processes, driven by planetary phenomena such as the changing of the seasons,  
325 determine the physical structure of the water column (e.g. temperature, stratification). These, in turn,  
326 affect the chemical conditions such as the supply and availability of nutrients. At the other end, the  
327 physiological traits that dictate where an organism can live operate at scales of nanometers or microns.  
328 These include, for example, the affinity for nutrients, the temperature optimum of enzymes or the  
329 ability of the organism to swim, perform chemotaxis and colonize particles. While clearly simplistic,  
330 these ideas provide a framework with which to interpret and understand the observed patterns in  
331 community structure in light of physical and biological drivers (Azam and Malfatti 2007, Karl 2007,  
332 Giovannoni and Vergin 2012, Seymour et al. 2017). In this study, we aimed to bridge these two  
333 viewpoints, describing how the microbial communities in the EMS change over different scales: between  
334 PA and FL communities, over depth and across seasons. Our results suggest that, in the EMS, depth and  
335 association with particles are stronger drivers of bacterial community structure when compared to  
336 seasonality. Moreover, the PA community exhibited fundamentally different dynamics from the FL one,  
337 being less diverse and exhibiting "heterotroph blooms" where different bacterial clades dominate at  
338 specific times and depths. We note that our dataset does not have the temporal resolution to fully

339 resolve seasonal changes (e.g. (Ward et al. 2017)), in particular as we did not sample during the  
340 maximum winter bloom.

341 In this study, we were able to explain less than 30% of the variability in the FL and PA community  
342 structure using “a-biotic” environmental conditions (the depth and season matrices). This is consistent  
343 with most other studies of bacterioplankton in marine environments (e.g. (Louca et al. 2016), but see  
344 (Thompson et al. 2016)). This leads us to propose that organismal interactions may have a strong impact  
345 on microbial population structure. In support of this hypothesis, 20% of the variability in the FL  
346 heterotrophic population structure could be explained only when both the depth and phytoplankton  
347 community structure matrices were included. The significant factors included pigments that are  
348 associated with prymnesiophytes and *Prochlorococcus*. Previous laboratory studies have shown that  
349 both organisms interact with co-occurring heterotrophic bacteria, and in turn are affected by them in  
350 both positive and negative ways (e.g. (Sher et al. 2011, Segev et al. 2016, Ma et al. 2017, Barak-Gavish et  
351 al. 2018)). The observation that the presence of these phytoplankton taxa correlates mostly with  
352 heterotrophic FL population structure suggest that, in the EMS, the main interactions occur through the  
353 production and utilization of dissolved organic matter rather than being contact-mediated interactions,  
354 e.g. in the phycosphere.

355 Aiming to raise testable hypotheses as to additional environmental factors that may impact the  
356 heterotrophic bacterial population structure in the EMS, we identified a possible enrichment in the PA  
357 community versus the FL one in pathways for the metabolism of anthropogenic pollutants, including  
358 pesticides, petroleum products and plastics. These results are based on an inference of community  
359 metagenomes, which may be biased by many factors, including unequal representation of different  
360 heterotrophic bacterial lineages in the genomic databases and genomic variability between taxa with  
361 closely related 16S sequences. We also currently do not have measurements of such pollutants across

362 time and space from the EMS, which are critical in order to test the potential impact of such molecules.  
363 We note, however, that, possibly due to analytical reasons (costs, detection limits etc.), anthropogenic  
364 pollutants are rarely incorporated into the oceanographic “world view”. Very few oceanographic cruises  
365 or time-series observatories include measurements of such contaminants. As a result, global maps of  
366 their distributions and dynamics (e.g. similar to those for nutrients, trace metals or organic carbon) are  
367 rare or nonexistent. Nevertheless, anthropogenic pollutants can affect the physiology of marine  
368 microorganisms, providing nourishment to some groups of organisms (Romera-Castillo et al. 2018) but  
369 potentially poisoning others, including picocyanobacteria which are at the base of oligotrophic food  
370 webs (Echeveste et al. 2010, Tetu et al. 2019). Our results suggest the need for better understanding of  
371 anthropogenic pollutants as potential drivers of microbial communities in the oceans.

372 Finally, to what extent can the results and hypotheses from this study be generalized from the EMS to  
373 other oligotrophic oceans? The EMS is unique among oligotrophic marine environments in being  
374 strongly depleted in P, with N:P ratios of inorganic nutrients, dissolved and particulate organic matter  
375  $\gg 16:1$ , compared to  $\sim 16$  in most other marine environments (Krom et al. 2005). This might explain the  
376 enrichment in the heterotrophic FL communities in the pathway for utilization of inositol phosphates,  
377 which are relatively abundant sources of organic P yet is not well characterized in the oceans (Turner et  
378 al. 2002). Additionally, the proximity of the EMS to land might increase the input fluxes of anthropogenic  
379 pollution, although such pollution is prevalent also in the most remote areas of the ocean (Rios et al.  
380 2010, Chen et al. 2018). Given the relative accessibility of the EMS and its importance as a sea that  
381 provides ecosystem services to millions of people, we anticipate that it will become a useful model  
382 system to study the processes affecting oligotrophic microbial communities, and how these processes  
383 change in a changing world.

384

385 **Brief Experimental Procedures**

386 **Sampling and analysis of nutrients, cell numbers and photosynthetic pigments:** Six one-day cruises  
387 were performed over a two-year period to station n-1200 (32 27.36 N, 034 22.47 E) onboard the R/V  
388 Mediterranean Explorer. Two cruises were in fall, (December 1<sup>st</sup>, 2014; November 18<sup>th</sup>, 2015), two in  
389 spring (March 24<sup>th</sup>, 2015; March 30<sup>th</sup>, 2016) and two in summer (July 14<sup>th</sup>, 2015; July 25<sup>th</sup>, 2016).  
390 Samples were collected using 8L Niskin bottles mounted on a rosette with a SeaBird CTD profiler (SBE  
391 19plus V2). Water was collected from 5-6 depths, corresponding to surface waters (10m), one-half of  
392 the observed DCM, the DCM, 200m and 500m (during the November 2015 cruise, when there was a  
393 shallow chlorophyll maximum, samples were collected at 50m and 100m). In several cruises an  
394 additional sample was collected from below the DCM and above 200m (termed the “Twilight zone”, or  
395 TZ, Supporting Information Excel Table). Due to the amount of water needed for each analysis a  
396 separate rosette cast was performed for each depth, resulting in samples being collected up to ~4 hours  
397 apart. The mixed layer depth was defined as the depth where potential density differed from surface  
398 values by  $>0.125 \text{ kg m}^{-3}$  (Malmstrom et al. 2010). We note that, during the spring cruises, there was no  
399 clear pycnocline and therefore the actual mixing likely extended significantly below the calculated MLD,  
400 but the estimates of the effect of seasonality on community structure are robust to differences in the  
401 MLD. Photosynthetic pigments were analyzed using a method adapted for UPLC from the LOV method  
402 (Hooker et al. 2005). More information on the pigment analysis, as well as details of the nutrient and  
403 flow cytometry analyses, can be found in the Supporting Information methods section.

404 **DNA sequencing and analysis:** 5-11.5L of seawater were filtered using a peristaltic pump onto three  
405 filters maintained in-line: 47mm 11 and 5  $\mu\text{m}$  nylon filters and 0.22  $\mu\text{m}$  sterivex filters (Millipore).  
406 Storage buffer (40 mM EDTA, 50 mM Tris pH 8.3, 0.75 M sucrose) was added to the samples which were  
407 frozen on-board on dry ice and maintained at  $-80^{\circ}\text{C}$  until analysis. DNA was extracted using a semi-

408 automated protocol that included manual mechanical and chemical cell lysis followed by automated  
409 nucleic acid extraction with a QIAcube system (Haber et al. 2020). PCR amplification was performed  
410 using the 16S primer set 515F-Y and 926R that targets the variable V4-5 region and is modified to  
411 amplify common oligotrophic bacterial lineages such as SAR11 (Parada et al. 2016). Libraries were  
412 sequenced using a MiSeq instrument, paired-end sequencing reads were merged, denoised, pre-  
413 processed, and assigned to taxonomic identifiers using Dada2 (version 1.1.6) (Callahan et al. 2016). Exact  
414 Sequence Variants (ESVs) were assigned taxonomy using the “classify.seqs” command in MOTHUR, the  
415 SILVA database (version 128) and an 80% identity cutoff (Schloss et al. 2009). For Variation Partitioning  
416 Analysis (VPA), we defined three matrices of conditions corresponding to those associated with  
417 seasonality (cruise number, season, sea surface temperature and mixed layer depth), depth (depth,  
418 temperature, NO<sub>x</sub> concentration and salinity) and phytoplankton community structure (the ratios of  
419 divinyl-chlorophyll a, chlorophyll b, 19'-hex fucoxanthin, fucoxanthin, peridinin and diadinoxanthin to  
420 total chlorophyll a). VPA was performed using “VarPart”, followed by conditional Canonical  
421 Correspondence Analysis (CCA) using the “cca” and “anova.cca” commands (all in the Vegan package).  
422 Metagenome inference from denoised sequences were performed using PICRUSt (Langille et al. 2013),  
423 as described previously (Goldford et al. 2018). Communities were normalized using the  
424 normalize\_otus.py function in PICRUSt, and the metagenomes were estimated using the  
425 estimate\_metagenome.py routine. The weighted NSTI values ranged between 0.07-0.25 (mean 0.16) for  
426 the PA heterotrophic bacteria and 0.09-0.20 (average 0.15) for the FL heterotrophs, within the range of  
427 other less-studied environments such as soil and mammalian metagenomes (Langille et al. 2013),  
428 suggesting that the results are useful to raise testable hypotheses but should be interpreted with  
429 caution. Due to the relatively large sample sizes (e.g. when comparing sample dissimilarities), Welch’s t-  
430 tests were used in Microsoft Excel to compare means, as recommended by (Fagerland 2012). More



431 detailed information on the DNA extraction, sequencing and quality control can be found in the

432 Supporting Information methods section.

433 **Data availability:** An excel table with the full environmental dataset, the ESV tables with and without

434 cyanobacteria, and the dynamics of ESVs belonging to specific clades, are presented in the Supporting

435 Excel File. The oceanographic data were deposited in the BCO-DMO under project acronym HADFBA.

436 The sequencing reads were deposited in the NCBI SRA database under project number PRJNA548664.

437 These data include also a transect from the coast to station n-1200, described elsewhere, (Haber et al.

438 2020).

439

440

#### 441 **Acknowledgments**

442 We thank the captain and crew of the R/V Mediterranean Explorer for their invaluable assistance during

443 the research cruises. We also thank the scientific team on all cruises for their assistance, Dr. Tanya Rivlin

444 (Interuniversity Institute for marine sciences, Eilat) for the nutrient analyses and Dr. Stephan Green

445 (DNA Services Facility at the University of Illinois at Chicago) for the amplicon sequencing. This study was

446 funded by the Israel Science Foundation grant (ISF #1243/16, to LS), the Human Frontiers Science

447 Program (grant number grant RGP0020/2016, to D. Segrè and D. Sher) and by the National Science

448 Foundation - United States-Israel Binational Science Foundation Program in Oceanography (grant

449 number 1635070/2016532 to D. Segrè and D. Sher). The seasonal cruises were supported by funding

450 from the Leon H. Charney School of Marine Sciences (Haifa University, Israel) and subsidized by the

451 EcoOcean Foundation. MH was supported by an Inter-Institutional post-doctoral fellowship from the

452 Haifa University and a Helmsley Trust fellowship.

453

454 **Conflict of interest**

455 The authors declare no conflict of interest.

456

457 **References**

- 458 Amin, S. A., M. S. Parker and E. V. Armbrust (2012). "Interactions between diatoms and bacteria."  
459 Microbiol Mol Biol Rev **76**(3): 667-684.
- 460 Azam, F. and F. Malfatti (2007). "Microbial structuring of marine ecosystems " Nature Reviews  
461 Microbiology **5**(12): 966-U923.
- 462 Azov, Y. (1986). "Seasonal patterns of phytoplankton productivity and abundance in nearshore  
463 oligotrophic waters of the Levant Basin (Mediterranean)." Journal of Plankton Research **8**(1): 41-53.
- 464 Barak-Gavish, N., M. J. Frada, C. Ku, P. A. Lee, G. R. DiTullio, S. Malitsky, A. Aharoni, S. J. Green, R.  
465 Rotkopf, E. Kartvelishvily, U. Sheyn, D. Schatz and A. Vardi (2018). "Bacterial virulence against an oceanic  
466 bloom-forming phytoplankter is mediated by algal DMSP." Science Advances **4**(10).
- 467 Berman, T., P. D. Walline, A. Schneller, J. Rothenberg and D. W. Townsend (1985). "Secchi disk depth  
468 record: A claim for the eastern Mediterranean1." Limnology and Oceanography **30**(2): 447-448.
- 469 Bižić-Ionescu, M., M. Zeder, D. Ionescu, S. Orlić, B. M. Fuchs, H.-P. Grossart and R. Amann (2015).  
470 "Comparison of bacterial communities on limnic versus coastal marine particles reveals profound  
471 differences in colonization." Environmental Microbiology **17**(10): 3500-3514.
- 472 Bleu, U. M.-P. (2009). UNEP/MAP-Plan Bleu: State of the Environment and Development in the  
473 Mediterranean. Athens.
- 474 Buchan, A., G. R. LeClerc, C. A. Gulvik and J. M. Gonzalez (2014). "Master recyclers: features and  
475 functions of bacteria associated with phytoplankton blooms." Nat Rev Micro **12**(10): 686-698.
- 476 Callahan, B. J., P. J. McMurdie, M. J. Rosen, A. W. Han, A. J. A. Johnson and S. P. Holmes (2016). "DADA2:  
477 High-resolution sample inference from Illumina amplicon data." Nature Methods **13**: 581.
- 478 Chen, Q., J. Reisser, S. Cunsolo, C. Kwadijk, M. Kotterman, M. Proietti, B. Slat, F. F. Ferrari, A. Schwarz, A.  
479 Levivier, D. Yin, H. Hollert and A. A. Koelmans (2018). "Pollutants in Plastics within the North Pacific  
480 Subtropical Gyre." Environmental Science & Technology **52**(2): 446-456.
- 481 Cirri, E. and G. Pohnert (2019). "Algae–bacteria interactions that balance the planktonic microbiome."  
482 New Phytologist **223**(1): 100-106.
- 483 De Martini, F., S. Neuer, D. Hamill, J. Robidart and M. W. Lomas (2018). "Clade and strain specific  
484 contributions of Synechococcus and Prochlorococcus to carbon export in the Sargasso Sea." Limnology  
485 and Oceanography **63**(S1): S448-S457.
- 486 DeLong, E. F., C. M. Preston, T. Mincer, V. Rich, S. J. Hallam, N. U. Frigaard, A. Martinez, M. B. Sullivan, R.  
487 Edwards, B. R. Brito, S. W. Chisholm and D. M. Karl (2006). "Community genomics among stratified  
488 microbial assemblages in the ocean's interior." Science **311**(5760): 496-503.
- 489 Durham, B. P., A. K. Boysen, L. T. Carlson, R. D. Groussman, K. R. Heal, K. R. Cain, R. L. Morales, S. N.  
490 Coesel, R. M. Morris, A. E. Ingalls and E. V. Armbrust (2019). "Sulfonate-based networks between  
491 eukaryotic phytoplankton and heterotrophic bacteria in the surface ocean." Nature Microbiology **4**(10):  
492 1706-1715.

493 Echeveste, P., S. Agusti and J. Dachs (2010). "Cell size dependent toxicity thresholds of polycyclic  
494 aromatic hydrocarbons to natural and cultured phytoplankton populations." Environmental Pollution  
495 **158**: 299-307.

496 Fagerland, M. W. (2012). "t-tests, non-parametric tests, and large studies—a paradox of statistical  
497 practice?" BMC Medical Research Methodology **12**(1): 78.

498 Fuhrman, J. A. (2009). "Microbial community structure and its functional implications." Nature  
499 **459**(7244): 193-199.

500 Ghiglione, J. F., G. Mevel, M. Pujó-Pay, L. Mousseau, P. Lebaron and M. Goutx (2007). "Diel and Seasonal  
501 Variations in Abundance, Activity, and Community Structure of Particle-Attached and Free-Living  
502 Bacteria in NW Mediterranean Sea." Microbial Ecology **54**(2): 217-231.

503 Ghosal, D., S. Ghosh, T. K. Dutta and Y. Ahn (2016). "Current State of Knowledge in Microbial  
504 Degradation of Polycyclic Aromatic Hydrocarbons (PAHs): A Review." Frontiers in microbiology **7**: 1369-  
505 1369.

506 Giovannoni, S. J. and K. L. Vergin (2012). "Seasonality in Ocean Microbial Communities." Science  
507 **335**(6069): 671-676.

508 Goldford, J. E., N. Lu, D. Bajić, S. Estrela, M. Tikhonov, A. Sanchez-Gorostiaga, D. Segrè, P. Mehta and A.  
509 Sanchez (2018). "Emergent simplicity in microbial community assembly." Science **361**(6401): 469-474.

510 Grossart, H. P., C. Dziallas, F. Leunert and K. W. Tang (2010). "Bacteria dispersal by hitchhiking on  
511 zooplankton." Proc Natl Acad Sci U S A **107**(26): 11959-11964.

512 Haber, M., D. Roth-Rosenberg, M. Lalar, I. Burgsdorf, K. Saurav, R. Lionheart, Y. Lehahn, D. Aharonovich,  
513 D. Sher, M. D. Krom and L. Steindler (2020). "Microbial communities in an ultra-oligotrophic sea are  
514 more affected by season than by distance from shore." bioRxiv: 2020.2004.2017.044305.

515 Haro-Moreno, J. M., M. López-Pérez, J. R. de la Torre, A. Picazo, A. Camacho and F. Rodriguez-Valera  
516 (2018). "Fine metagenomic profile of the Mediterranean stratified and mixed water columns revealed by  
517 assembly and recruitment." Microbiome **6**(1): 128.

518 Herut, B., R. Collier and M. D. Krom (2002). "The role of dust in supplying nitrogen and phosphorus to  
519 the Southeast Mediterranean." Limnology and Oceanography **47**(3): 870-878.

520 Hooker, S. B., L. Heukelem, C. Thomas, H. Claustre, J. Ras, R. Barlow, H. Sessions, L. Schlüter, J. Perl, C.  
521 Trees, V. Stuart, E. Head, L. Clementson, J. Fishwick, C. Llewellyn and J. Aiken (2005). "The Second  
522 SeaWiFS HPLC Analysis Round-Robin Experiment (SeaHARRE-2)." NASA Technical Memorandum: 1-112.

523 Iakovides, M., E. G. Stephanou, M. Apostolaki, M. Hadjicharalambous, J. S. Evans, P. Koutrakis and S.  
524 Achilleos (2019). "Study of the occurrence of airborne Polycyclic Aromatic Hydrocarbons associated with  
525 respirable particles in two coastal cities at Eastern Mediterranean: Levels, source apportionment, and  
526 potential risk for human health." Atmospheric Environment **213**: 170-184.

527 Jeffrey, S. W., R. F. C. Mantoura and S. W. Wright (2005). Phytoplankton pigments in oceanography:  
528 guidelines to modern methods. France, UNESCO.

529 Karl, D. M. (2007). "Microbial oceanography: paradigms, processes and promise." Nat Rev Microbiol  
530 **5**(10): 759-769.

531 Karl, D. M., R. R. Bidigare and R. M. Letelier (2002). Sustained and Aperiodic Variability in Organic Matter  
532 Production and Phototrophic Microbial Community Structure in the North Pacific Subtropical Gyre.  
533 Phytoplankton Productivity. P. J. I. B. Williams, D. N. Thomas and C. S. Reynolds, Wiley: 222-264.

534 Krom, M. D., E. M. S. Woodward, B. Herut, N. Kress, P. Carbo, R. F. C. Mantoura, G. Spyres, T. F.  
535 Thingstad, P. Wassmann, C. Wexels-Riser, V. Kitidis, C. S. Law and G. Zodiatis (2005). "Nutrient cycling in  
536 the south east Levantine basin of the eastern Mediterranean: Results from a phosphorus starved  
537 system." Deep Sea Research Part II: Topical Studies in Oceanography **52**(22–23): 2879-2896.

538 Kwon, B. G., K. Koizumi, S.-Y. Chung, Y. Kodera, J.-O. Kim and K. Saido (2015). "Global styrene oligomers  
539 monitoring as new chemical contamination from polystyrene plastic marine pollution." Journal of  
540 Hazardous Materials **300**: 359-367.

541 Langille, M. G. I., J. Zaneveld, J. G. Caporaso, D. McDonald, D. Knights, J. A. Reyes, J. C. Clemente, D. E.  
542 Burkpile, R. L. Vega Thurber, R. Knight, R. G. Beiko and C. Huttenhower (2013). "Predictive functional  
543 profiling of microbial communities using 16S rRNA marker gene sequences." Nature Biotechnology **31**:  
544 814.

545 Lauro, F. M., D. McDougald, T. Thomas, T. J. Williams, S. Egan, S. Rice, M. Z. DeMaere, L. Ting, H. Ertan, J.  
546 Johnson, S. Ferriera, A. Lapidus, I. Anderson, N. Kyrpides, A. C. Munk, C. Detter, C. S. Han, M. V. Brown,  
547 F. T. Robb, S. Kjelleberg and R. Cavicchioli (2009). "The genomic basis of trophic strategy in marine  
548 bacteria." Proceedings of the National Academy of Sciences **106**(37): 15527-15533.

549 Lomas, M. W. and S. B. Moran (2012). "Evidence for aggregation and export of cyanobacteria and nano-  
550 eukaryotes from the Sargasso Sea euphotic zone." Biogeosciences **7**(5): 7173-7206.

551 Louca, S., L. W. Parfrey and M. Doebeli (2016). "Decoupling function and taxonomy in the global ocean  
552 microbiome." Science **353**(6305): 1272-1277.

553 Ma, L., B. C. Calfee, J. J. Morris, Z. I. Johnson and E. R. Zinser (2017). "Degradation of hydrogen peroxide  
554 at the ocean's surface: the influence of the microbial community on the realized thermal niche of  
555 *Prochlorococcus*." The ISME Journal **12**: 473.

556 Malmstrom, R. R., A. Coe, G. C. Kettler, A. C. Martiny, J. Frias-Lopez, E. R. Zinser and S. W. Chisholm  
557 (2010). "Temporal dynamics of *Prochlorococcus* ecotypes in the Atlantic and Pacific oceans." ISME J.  
558 Man-Aharonovich, D., A. Philosofo, B. C. Kirkup, F. Le Gall, T. Yogev, I. Berman-Frank, M. F. Polz, D. Vaulot  
559 and O. Beja (2010). "Diversity of active marine picoeukaryotes in the Eastern Mediterranean Sea  
560 unveiled using photosystem-II *psbA* transcripts." ISME J **4**(8): 1044-1052.

561 Martin-Platero, A. M., B. Cleary, K. Kauffman, S. P. Preheim, D. J. McGillicuddy, E. J. Alm and M. F. Polz  
562 (2018). "High resolution time series reveals cohesive but short-lived communities in coastal plankton."  
563 Nature Communications **9**(1): 266.

564 Mende, D. R., D. Boeuf and E. F. DeLong (2019). "Persistent Core Populations Shape the Microbiome  
565 Throughout the Water Column in the North Pacific Subtropical Gyre." Frontiers in Microbiology  
566 **10**(2273).

567 Mestre, M., E. Borrull, M. M. Sala and J. M. Gasol (2017). "Patterns of bacterial diversity in the marine  
568 planktonic particulate matter continuum." The ISME Journal **11**(4): 999-1010.

569 Mestre, M., I. Ferrera, E. Borrull, E. Ortega-Retuerta, S. Mbedi, H.-P. Grossart, J. M. Gasol and M. M. Sala  
570 (2017). "Spatial variability of marine bacterial and archaeal communities along the particulate matter  
571 continuum." Molecular Ecology **26**(24): 6827-6840.

572 Mestre, M., C. Ruiz-González, R. Logares, C. M. Duarte, J. M. Gasol and M. M. Sala (2018). "Sinking  
573 particles promote vertical connectivity in the ocean microbiome." Proceedings of the National Academy  
574 of Sciences **115**(29): E6799-E6807.

575 Milici, M., Z.-L. Deng, J. Tomasch, J. Decelle, M. L. Wos-Oxley, H. Wang, R. Jáuregui, I. Plumeier, H.-A.  
576 Giebel, T. H. Badewien, M. Wurst, D. H. Pieper, M. Simon and I. Wagner-Döbler (2016). "Co-occurrence  
577 Analysis of Microbial Taxa in the Atlantic Ocean Reveals High Connectivity in the Free-Living  
578 Bacterioplankton." Frontiers in Microbiology **7**(649).

579 Oberbeckmann, S. and M. Labrenz (2020). "Marine Microbial Assemblages on Microplastics: Diversity,  
580 Adaptation, and Role in Degradation." Annual Review of Marine Science **12**(1): null.

581 Ozer, T., I. Gertman, N. Kress, J. Silverman and B. Herut (2017). "Interannual thermohaline (1979–2014)  
582 and nutrient (2002–2014) dynamics in the Levantine surface and intermediate water masses, SE  
583 Mediterranean Sea." Global and Planetary Change **151**: 60-67.

584 Parada, A. E., D. M. Needham and J. A. Fuhrman (2016). "Every base matters: assessing small subunit  
585 rRNA primers for marine microbiomes with mock communities, time series and global field samples."  
586 Environmental Microbiology **18**(5): 1403-1414.

587 Powley, H. R., M. D. Krom and P. Van Cappellen (2017). "Understanding the unique biogeochemistry of  
588 the Mediterranean Sea: Insights from a coupled phosphorus and nitrogen model." Global  
589 Biogeochemical Cycles **31**(6): 1010-1031.

590 Raveh, O., N. David, G. Rilov and E. Rahav (2015). "The Temporal Dynamics of Coastal Phytoplankton and  
591 Bacterioplankton in the Eastern Mediterranean Sea." PLOS ONE **10**(10): e0140690.

592 Richardson, T. L. and G. A. Jackson (2007). "Small phytoplankton and carbon export from the surface  
593 ocean." Science **315**(5813): 838-840.

594 Rieck, A., D. P. R. Herlemann, K. Jürgens and H.-P. Grossart (2015). "Particle-Associated Differ from Free-  
595 Living Bacteria in Surface Waters of the Baltic Sea." Frontiers in Microbiology **6**(1297).

596 Rios, L. M., P. R. Jones, C. Moore and U. V. Narayan (2010). "Quantitation of persistent organic  
597 pollutants adsorbed on plastic debris from the Northern Pacific Gyre's "eastern garbage patch"." Journal  
598 of Environmental Monitoring **12**(12): 2226-2236.

599 Romera-Castillo, C., M. Pinto, T. M. Langer, X. A. Álvarez-Salgado and G. J. Herndl (2018). "Dissolved  
600 organic carbon leaching from plastics stimulates microbial activity in the ocean." Nature  
601 Communications **9**(1): 1430.

602 Salazar, G., L. Paoli, A. Alberti, J. Huerta-Cepas, H.-J. Ruscheweyh, M. Cuenca, C. M. Field, L. P. Coelho, C.  
603 Cruaud, S. Engelen, A. C. Gregory, K. Labadie, C. Marec, E. Pelletier, M. Royo-Llonch, S. Roux, P. Sánchez,  
604 H. Uehara, A. A. Zayed, G. Zeller, M. Carmichael, C. Dimier, J. Ferland, S. Kandels, M. Picheral, S. Pisarev,  
605 J. Poulain, S. G. Acinas, M. Babin, P. Bork, E. Boss, C. Bowler, G. Cochrane, C. de Vargas, M. Follows, G.  
606 Gorsky, N. Grimsley, L. Guidi, P. Hingamp, D. Iudicone, O. Jaillon, S. Kandels-Lewis, L. Karp-Boss, E.  
607 Karsenti, F. Not, H. Ogata, S. Pesant, N. Poulton, J. Raes, C. Sardet, S. Speich, L. Stemmann, M. B.  
608 Sullivan, S. Sunagawa, P. Wincker, S. G. Acinas, M. Babin, P. Bork, C. Bowler, C. de Vargas, L. Guidi, P.  
609 Hingamp, D. Iudicone, L. Karp-Boss, E. Karsenti, H. Ogata, S. Pesant, S. Speich, M. B. Sullivan, P. Wincker  
610 and S. Sunagawa (2019). "Gene Expression Changes and Community Turnover Differentially Shape the  
611 Global Ocean Metatranscriptome." Cell **179**(5): 1068-1083.e1021.

612 Schloss, P. D., S. L. Westcott, T. Ryabin, J. R. Hall, M. Hartmann, E. B. Hollister, R. A. Lesniewski, B. B.  
613 Oakley, D. H. Parks, C. J. Robinson, J. W. Sahl, B. Stres, G. G. Thallinger, D. J. Van Horn and C. F. Weber  
614 (2009). "Introducing mothur: Open-Source, Platform-Independent, Community-Supported Software for  
615 Describing and Comparing Microbial Communities." Applied and Environmental Microbiology **75**(23):  
616 7537-7541.

617 Segev, E., T. P. Wyche, K. H. Kim, J. Petersen, C. Ellebrandt, H. Vlamakis, N. Barteneva, J. N. Paulson, L.  
618 Chai, J. Clardy and R. Kolter (2016). "Dynamic metabolic exchange governs a marine algal-bacterial  
619 interaction." eLife **5**: e17473.

620 Seymour, J. R., S. A. Amin, J.-B. Raina and R. Stocker (2017). "Zooming in on the phycosphere: the  
621 ecological interface for phytoplankton–bacteria relationships." Nature Microbiology **2**: 17065.

622 Sher, D., J. W. Thompson, N. Kashtan, L. Croal and S. W. Chisholm (2011). "Response of Prochlorococcus  
623 ecotypes to co-culture with diverse marine bacteria." ISME J **5**(7): 1125-1132.

624 Sunagawa, S., L. P. Coelho, S. Chaffron, J. R. Kultima, K. Labadie, G. Salazar, B. Djahanschiri, G. Zeller, D.  
625 R. Mende, A. Alberti, F. M. Cornejo-Castillo, P. I. Costea, C. Cruaud, F. d'Ovidio, S. Engelen, I. Ferrera, J.  
626 M. Gasol, L. Guidi, F. Hildebrand, F. Kokoszka, C. Lepoivre, G. Lima-Mendez, J. Poulain, B. T. Poulos, M.  
627 Royo-Llonch, H. Sarmiento, S. Vieira-Silva, C. Dimier, M. Picheral, S. Searson, S. Kandels-Lewis, T. O.  
628 coordinators, C. Bowler, C. de Vargas, G. Gorsky, N. Grimsley, P. Hingamp, D. Iudicone, O. Jaillon, F. Not,  
629 H. Ogata, S. Pesant, S. Speich, L. Stemmann, M. B. Sullivan, J. Weissenbach, P. Wincker, E. Karsenti, J.  
630 Raes, S. G. Acinas and P. Bork (2015). "Structure and function of the global ocean microbiome." Science  
631 **348**(6237).

632 Tetu, S. G., I. Sarker, V. Schrammeyer, R. Pickford, L. D. H. Elbourne, L. R. Moore and I. T. Paulsen (2019).  
633 "Plastic leachates impair growth and oxygen production in Prochlorococcus, the ocean's most abundant  
634 photosynthetic bacteria." Communications Biology **2**(1): 184.

635 Thingstad, T. F., M. D. Krom, R. F. C. Mantoura, G. A. F. Flaten, S. Groom, B. Herut, N. Kress, C. S. Law, A.  
636 Pasternak, P. Pitta, S. Psarra, F. Rassoulzadegan, T. Tanaka, A. Tselepidis, P. Wassmann, E. M. S.  
637 Woodward, C. W. Riser, G. Zodiatis and T. Zohary (2005). "Nature of Phosphorus Limitation in the  
638 Ultraoligotrophic Eastern Mediterranean." Science **309**(5737): 1068-1071.  
639 Thompson, L. R., G. J. Williams, M. F. Haroon, A. Shibl, P. Larsen, J. Shorenstein, R. Knight and U. Stingl  
640 (2016). "Metagenomic covariation along densely sampled environmental gradients in the Red Sea." The  
641 ISME Journal **11**: 138.  
642 Turner, B. L., M. J. Papházy, P. M. Haygarth and I. D. McKelvie (2002). "Inositol phosphates in the  
643 environment." Philosophical transactions of the Royal Society of London. Series B, Biological sciences  
644 **357**(1420): 449-469.  
645 Ward, C. S., C.-M. Yung, K. M. Davis, S. K. Blinbry, T. C. Williams, Z. I. Johnson and D. E. Hunt (2017).  
646 "Annual community patterns are driven by seasonal switching between closely related marine bacteria."  
647 The ISME Journal **11**(6): 1412-1422.

648
